# Supplementary material for: Supervised learning with decision margins in pools of spiking neurons
Source: Springer Nature journal article supplement (doi:10.1007/s10827-014-0505-9), 2014-05-26

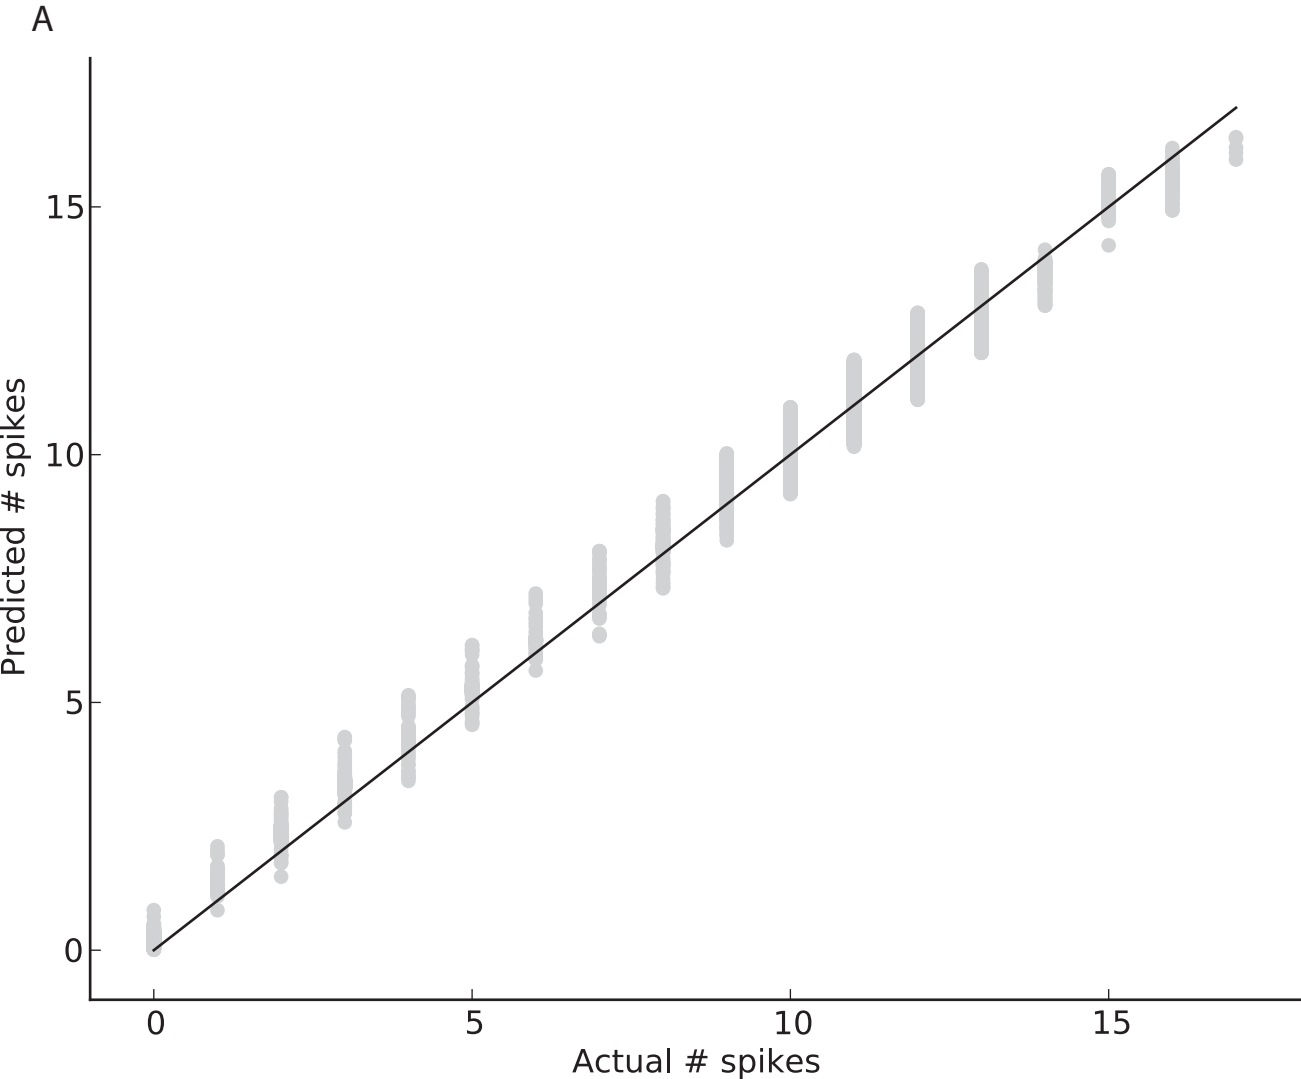

Supplement: MOESM1 [file 11727012]
